# Supplementary material for: Joint modeling under competing risks: Application to survival prediction in patients admitted in Intensive Care Unit for sepsis with daily Sequential Organ Failure Assessment score assessments
Source: PubMed Central journal article supplement — CPT Pharmacometrics Syst Pharmacol. 2022 Oct 6;11(11):1472–84. doi: 10.1002/psp4.12856 (PMC9662207; doi:10.1002/psp4.12856), 2022-10-06
Supplement: PSP4-11-1472-s004.pdf [file PSP4-11-1472-s004.pdf]

## Supplementary Materials - Baseline model fit

Table S3 : Parameter estimates of the baseline model (with baseline SOFA and age at admission)

| Parameter                  | Value  | S.E.    | RSE (%) | p-value             |
|----------------------------|--------|---------|---------|---------------------|
| <i>Death</i>               |        |         |         |                     |
| $h_1$                      | 0.0012 | 0.00013 | 11      |                     |
| $\beta_{S_1}$              | 0.20   | 0.0093  | 5       | $< 10^{-16}$        |
| $\beta_{1, Age_{[60,75]}}$ | 0.34   | 0.091   | 27      | 0.0002              |
| $\beta_{1, Age_{\geq 75}}$ | 0.61   | 0.089   | 15      | $7 \times 10^{-12}$ |
| <i>Discharge</i>           |        |         |         |                     |
| $h_2$                      | 0.13   | 0.0053  | 4       |                     |
| $\beta_{S_2}$              | -0.12  | 0.0052  | 4       | $< 10^{-16}$        |
| $\beta_{2, Age_{[60,75]}}$ | -0.21  | 0.044   | 20      | $2 \times 10^{-6}$  |
| $\beta_{2, Age_{\geq 75}}$ | -0.26  | 0.046   | 18      | $2 \times 10^{-8}$  |
