# Supplementary material for: Joint modeling under competing risks: Application to survival prediction in patients admitted in Intensive Care Unit for sepsis with daily Sequential Organ Failure Assessment score assessments
Source: PubMed Central journal article supplement — CPT Pharmacometrics Syst Pharmacol. 2022 Oct 6;11(11):1472–84. doi: 10.1002/psp4.12856 (PMC9662207; doi:10.1002/psp4.12856), 2022-10-06
Supplement: PSP4-11-1472-s005.pdf [file PSP4-11-1472-s005.pdf]

## Supplementary Materials - BIC for different models including baseline SOFA score and some covariates

Table S2 : Bayesian information criteria (BIC) for different joint models including the baseline SOFA and some baseline covariates in the survival part.

| <b>Covariates included</b>   | <b>BIC*</b> |
|------------------------------|-------------|
| $\emptyset$                  | 31 327      |
| Age                          | 31 273      |
| Gender                       | 31 338      |
| Comorbidities                | 31 332      |
| Age + Gender                 | 31 284      |
| Age + Comorbidities          | 31 293      |
| Gender + Comorbidities       | 31 344      |
| Age + Gender + Comorbidities | 31 304      |

\*Computed on the training data set.
