# Supplementary material for: Joint modeling under competing risks: Application to survival prediction in patients admitted in Intensive Care Unit for sepsis with daily Sequential Organ Failure Assessment score assessments
Source: PubMed Central journal article supplement — CPT Pharmacometrics Syst Pharmacol. 2022 Oct 6;11(11):1472–84. doi: 10.1002/psp4.12856 (PMC9662207; doi:10.1002/psp4.12856), 2022-10-06
Supplement: PSP4-11-1472-s006.pdf [file PSP4-11-1472-s006.pdf]

## Supplementary Materials - Simulation study: relative errors on parameter estimation

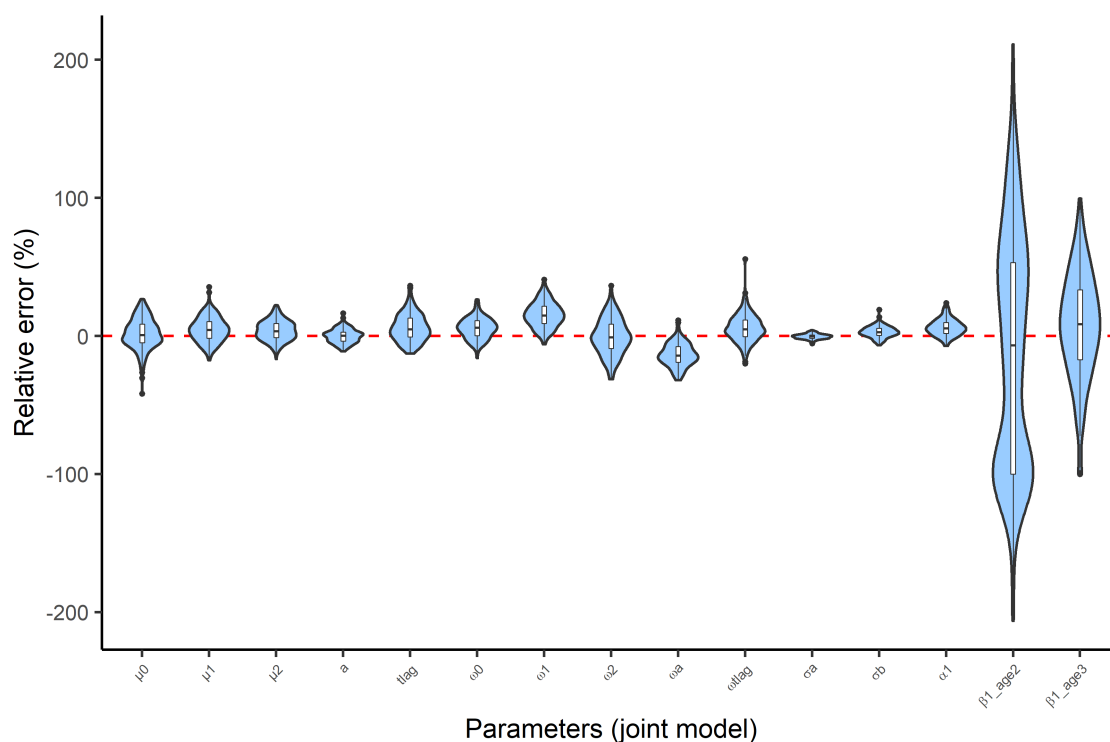

Figure S2 A: Distribution of relative errors of parameter estimates of the joint model (%)

The violin plots demonstrate good properties of estimators, in particular for the coefficient which links the longitudinal process and the survival process. All longitudinal parameters are accurate and precisely estimated too. However, the variability on parameters associated with baseline covariate is high, although the bias is closed to zero.

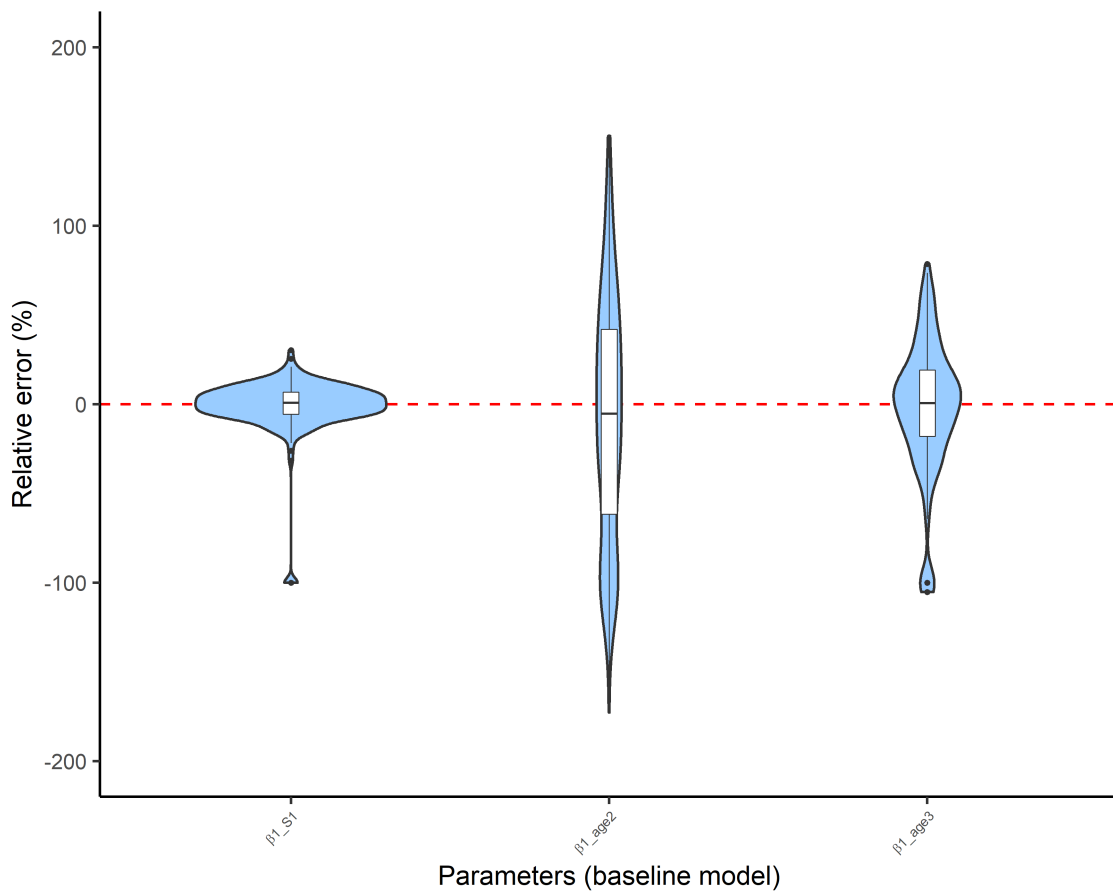

Figure S2 B: Distribution of relative errors of parameter estimates of the baseline model (%)
