# Supplementary material for: Joint modeling under competing risks: Application to survival prediction in patients admitted in Intensive Care Unit for sepsis with daily Sequential Organ Failure Assessment score assessments
Source: PubMed Central journal article supplement — CPT Pharmacometrics Syst Pharmacol. 2022 Oct 6;11(11):1472–84. doi: 10.1002/psp4.12856 (PMC9662207; doi:10.1002/psp4.12856), 2022-10-06
Supplement: PSP4-11-1472-s008.pdf [file PSP4-11-1472-s008.pdf]

## **Supplementary Information S2 - Ethical considerations**

The database is in accordance with French legislation concerning biomedical research. Patients or their family gave authorization for collection, conservation, and use of their personal anonymized data. Authorizations were obtained from the French Informatics and Liberty Commission (CNIL, registration no. 8999262), the French Advisory Committee for Data Processing in Health Research (CCTIRS). The database protocol was submitted to the Institutional Review Board of the Clermont-Ferrand University hospital (Clermont-Ferrand, France), who waived the need for informed consent (IRB no. 5891).
