# Supplementary material for: Joint modeling under competing risks: Application to survival prediction in patients admitted in Intensive Care Unit for sepsis with daily Sequential Organ Failure Assessment score assessments
Source: PubMed Central journal article supplement — CPT Pharmacometrics Syst Pharmacol. 2022 Oct 6;11(11):1472–84. doi: 10.1002/psp4.12856 (PMC9662207; doi:10.1002/psp4.12856), 2022-10-06
Supplement: PSP4-11-1472-s009.pdf [file PSP4-11-1472-s009.pdf]

# Supplementary Materials - BIC for different error models (joint model)

Table S1: Bayesian information criteria (BIC) for different error models tested within the joint model

| <b>Error model</b> | <b>BIC*</b> |
|--------------------|-------------|
| constant           | 217 596     |
| proportional       | 217 703     |
| combined           | 216 819     |

\* Computed on the training data set
