# Supplementary material for: Joint modeling under competing risks: Application to survival prediction in patients admitted in Intensive Care Unit for sepsis with daily Sequential Organ Failure Assessment score assessments
Source: PubMed Central journal article supplement — CPT Pharmacometrics Syst Pharmacol. 2022 Oct 6;11(11):1472–84. doi: 10.1002/psp4.12856 (PMC9662207; doi:10.1002/psp4.12856), 2022-10-06
Supplement: PSP4-11-1472-s010.pdf [file PSP4-11-1472-s010.pdf]

## Supplementary Materials - Predictive performances of the baseline model

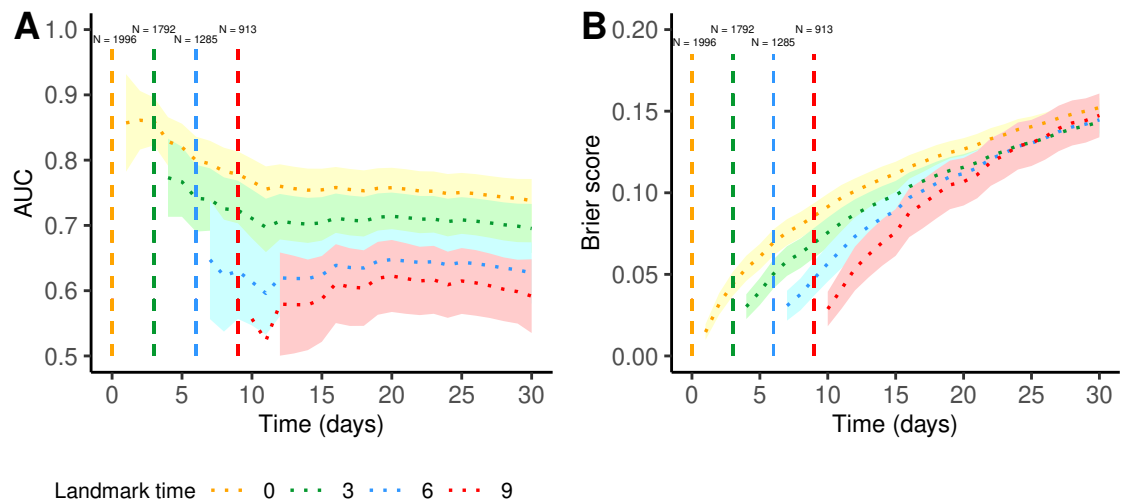

Figure S1: Time dependant AUC (A) and Brier score (B) within the baseline model computed on the validation set depending on landmark time. 95% confidence intervals are represented by the corresponding coloured intervals. Number of at-risk patients at each landmark time is specified on the top.
